# Supplementary material for: Market Chickens as a Source of Antibiotic-Resistant Escherichia coli in a Peri-Urban Community in Lima, Peru
Source: PubMed Central journal article supplement (PMC7961087; doi:10.3389/fmicb.2021.635871), 2021-03-02

**Figure 2.** Plasmid replicon marker sequences among sequenced *E. coli*

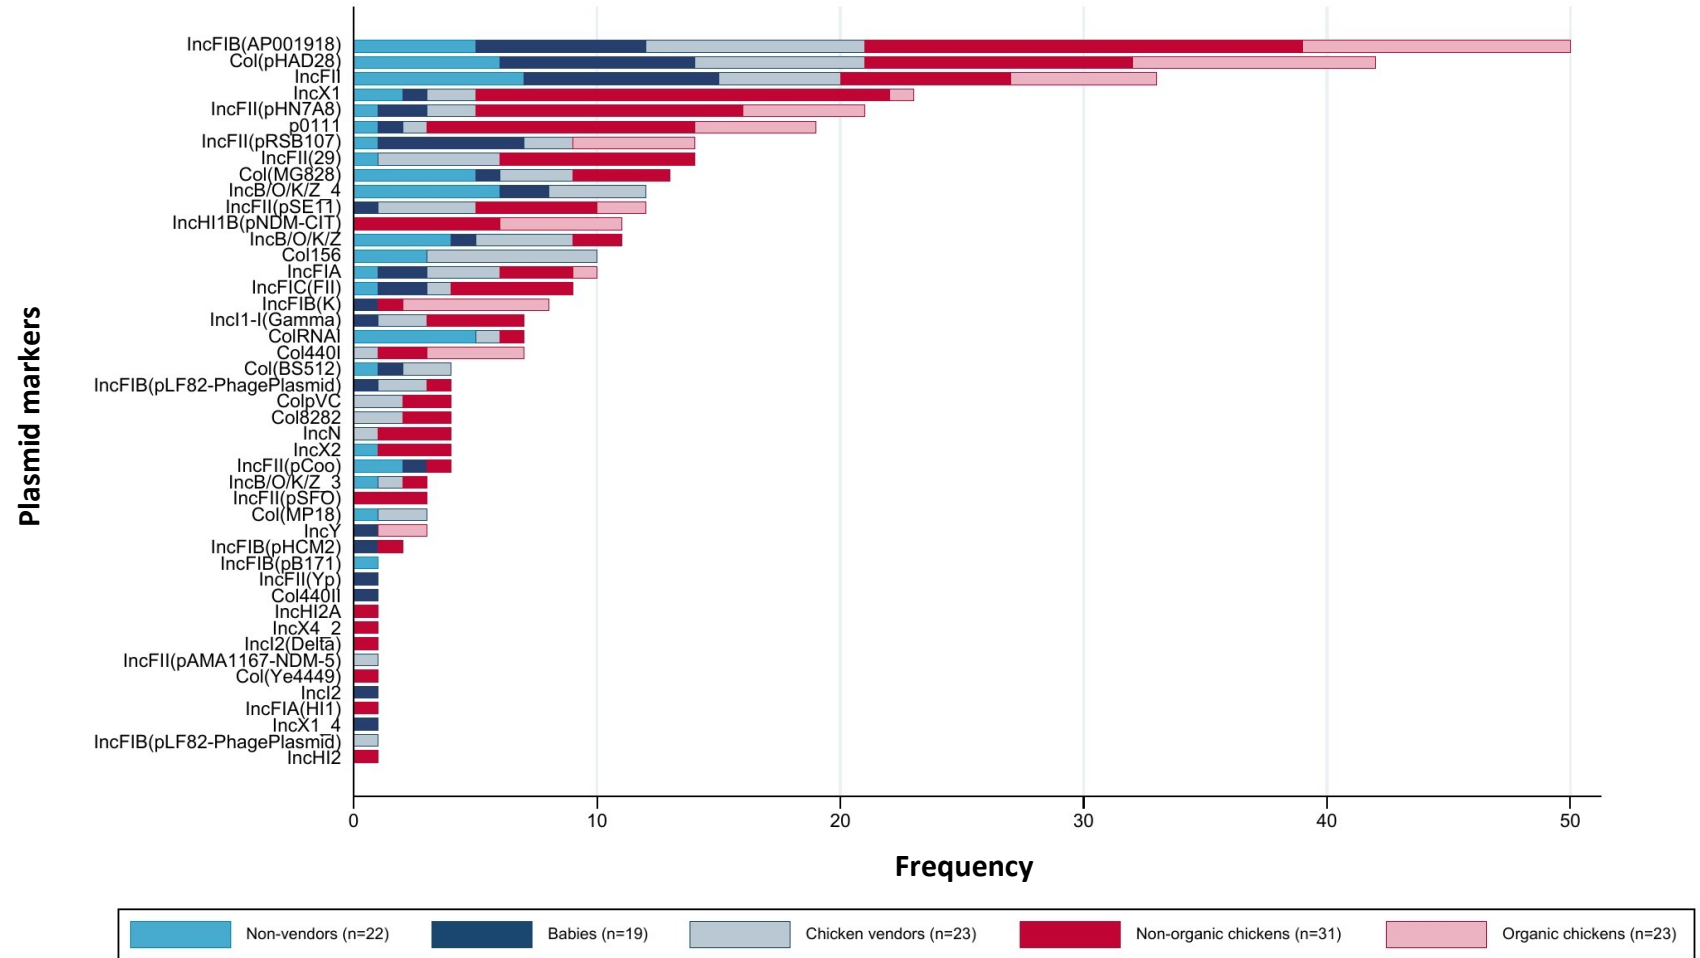

Supplement: Image_2.pdf [file Image_2.pdf]
